# Supplementary material for: BaSc2(HPO3)4(H2O)2: a new nonlinear optical phosphite exhibiting a 3D {[Sc2(HPO3)4]2−}∞ anionic framework and phase-matchable SHG effect
Source: Royal Society of Chemistry journal article supplement (doi:10.1039/d2qi01549h), 2022-01-01
Supplement: d2qi01549h1.pdf [file d2qi01549h1.pdf]

## *Supporting Information*

### **BaSc<sub>2</sub>(HPO<sub>3</sub>)<sub>4</sub>(H<sub>2</sub>O)<sub>2</sub>: A New Nonlinear Optical Phosphite Exhibiting 3D [Sc<sub>2</sub>(HPO<sub>3</sub>)<sub>4</sub>]<sup>2-</sup> Anionic Framework and Phase Matchable SHG Effect**

*Ru-Ling Tang\**, *Gang-Xiang Liu*, *Wen-Dong Yao*, *Li-Nan Zhang*, *Wenlong Liu*, and *Sheng-Ping Guo\**

†School of Chemistry and Chemical Engineering, Yangzhou University, Yangzhou, Jiangsu 225002, P. R. China

*Corresponding author: spguo@yzu.edu.cn, rltang@yzu.edu.cn*

---

## Supplementary Information Index

### Figures and Tables

- (1) **Table S1.** Selected bond lengths for  $\text{BaSc}_2(\text{HPO}_3)_4(\text{H}_2\text{O})_2$ .
- (2) **Table S2.** Selected bond angles for  $\text{BaSc}_2(\text{HPO}_3)_4(\text{H}_2\text{O})_2$ .
- (3) **Table S3.** Fractional atomic coordinates ( $\text{\AA}\times 10^4$ ) and equivalent isotropic displacement Parameters ( $\text{\AA}^2\times 10^3$ ) for  $\text{BaSc}_2(\text{HPO}_3)_4(\text{H}_2\text{O})_2$ .
- (4) **Table S4.** Hydrogen Atom Coordinates ( $\text{\AA}\times 10^4$ ) and Isotropic Displacement Parameters ( $\text{\AA}^2\times 10^3$ ) for  $\text{BaSc}_2(\text{HPO}_3)_4(\text{H}_2\text{O})_2$ .
- (5) **Table S5.** The quantitative analysis table of EDS.
- (6) **Figure S1.** The coordination geometries of Ba, Sc and P atoms in the structure of  $\text{BaSc}_2(\text{HPO}_3)_4(\text{H}_2\text{O})_2$ .
- (7) **Figure S2.** The EDS image for single-crystals of  $\text{BaSc}_2(\text{HPO}_3)_4(\text{H}_2\text{O})_2$ .
- (8) **Figure S3.** The PXRD of  $\text{BaSc}_2(\text{HPO}_3)_4(\text{H}_2\text{O})_2$  heated to 1000 °C.

**Table S1.** Selected Bond lengths for BaSc<sub>2</sub>(HPO<sub>3</sub>)<sub>4</sub>(H<sub>2</sub>O)<sub>2</sub>.

| BaSc <sub>2</sub> (HPO <sub>3</sub> ) <sub>4</sub> (H <sub>2</sub> O) <sub>2</sub> |          |                      |          |
|------------------------------------------------------------------------------------|----------|----------------------|----------|
| Atom–Atom                                                                          | Length/Å | Atom–Atom            | Length/Å |
| Ba1–O5                                                                             | 2.850(4) | Sc1–O10 <sup>7</sup> | 2.101(4) |
| Ba1–O9 <sup>1</sup>                                                                | 2.994(4) | P3–O9                | 1.534(4) |
| Ba1–O9 <sup>2</sup>                                                                | 3.039(4) | P3–O7                | 1.503(4) |
| Ba1–O7 <sup>2</sup>                                                                | 2.985(4) | P3–O8                | 1.498(4) |
| Ba1–O8 <sup>1</sup>                                                                | 2.850(5) | P1–O12               | 1.516(5) |
| Ba1–O6                                                                             | 3.111(5) | P1–O11               | 1.509(5) |
| Ba1–O14                                                                            | 2.807(5) | P1–O10               | 1.516(4) |
| Ba1 <sup>9</sup> –O10                                                              | 3.173(5) | P2–O1                | 1.530(5) |
| Ba1–O14 <sup>3</sup>                                                               | 3.103(6) | P2–O2                | 1.520(5) |
| Ba1–O13                                                                            | 2.716(6) | P2–O3                | 1.500(5) |
| Sc2–O12 <sup>4</sup>                                                               | 2.077(4) | P4–O5                | 1.511(4) |
| Sc2–O4                                                                             | 2.049(4) | P4–O4                | 1.507(4) |
| Sc2–O7                                                                             | 2.086(4) | P4–O6                | 1.519(5) |
| Sc2–O8 <sup>5</sup>                                                                | 2.090(4) |                      |          |
| Sc2–O6 <sup>6</sup>                                                                | 2.080(4) |                      |          |
| Sc2–O3                                                                             | 2.054(4) |                      |          |
| Sc1–O5                                                                             | 2.084(4) |                      |          |
| Sc1–O9 <sup>2</sup>                                                                | 2.143(4) |                      |          |
| Sc1–O1 <sup>7</sup>                                                                | 2.087(4) |                      |          |
| Sc1–O11                                                                            | 2.040(4) |                      |          |
| Sc1–O2                                                                             | 2.051(4) |                      |          |

<sup>1</sup>–1/2+x,1–y,–3/2+z; <sup>2</sup>+x,+y,–1+z; <sup>3</sup>–1/2+x,2–y,1/2+z; <sup>4</sup>+x,+y,1+z; <sup>5</sup>–1/2+x,1–y,–1/2+z; <sup>6</sup>1/2+x,1–y,1/2+z;  
<sup>7</sup>–1/2+x,2–y,–1/2+z; <sup>8</sup>1/2+x,1–y,3/2+z; <sup>9</sup>1/2+x,2–y,–1/2+z; <sup>10</sup>1/2+x,2–y,1/2+z

**Table S2.** Selected bond angles for BaSc<sub>2</sub>(HPO<sub>3</sub>)<sub>4</sub>(H<sub>2</sub>O)<sub>2</sub>.

| BaSc <sub>2</sub> (HPO <sub>3</sub> ) <sub>4</sub> (H <sub>2</sub> O) <sub>2</sub> |            |                                       |            |
|------------------------------------------------------------------------------------|------------|---------------------------------------|------------|
| Atom–Atom–Atom                                                                     | Angle/°    | Atom–Atom–Atom                        | Angle/°    |
| P4–O5–Sc1                                                                          | 144.8(3)   | O5–Sc1–O9 <sup>2</sup>                | 84.94(17)  |
| P3–O9–Sc1 <sup>4</sup>                                                             | 129.5(2)   | O5–Sc1–O1 <sup>7</sup>                | 90.99(17)  |
| P1–O12–Sc2 <sup>9</sup>                                                            | 139.2(3)   | O5–Sc1–O10 <sup>7</sup>               | 82.70(17)  |
| P2–O1–Sc1 <sup>10</sup>                                                            | 134.7(3)   | O1 <sup>7</sup> –Sc1–O9 <sup>2</sup>  | 174.20(17) |
| P4–O4–Sc2                                                                          | 155.6(3)   | O1 <sup>7</sup> –Sc1–O10 <sup>7</sup> | 91.71(17)  |
| P3–O7–Sc2                                                                          | 150.8(3)   | O11–Sc1–O5                            | 175.11(17) |
| P1–O11–Sc1                                                                         | 150.8(3)   | O11–Sc1–O9 <sup>2</sup>               | 93.17(18)  |
| P2–O2–Sc1                                                                          | 149.7(3)   | O11–Sc1–O1 <sup>7</sup>               | 90.56(19)  |
| P1–O10–Sc1 <sup>10</sup>                                                           | 153.6(3)   | O11–Sc1–O2                            | 91.86(18)  |
| P3–O8–Sc2 <sup>6</sup>                                                             | 147.4(3)   | O11–Sc1–O10 <sup>7</sup>              | 92.62(17)  |
| P4–O6–Sc2 <sup>5</sup>                                                             | 138.1(3)   | O2–Sc1–O5                             | 92.46(17)  |
| P2–O3–Sc2                                                                          | 143.0(3)   | O2–Sc1–O9 <sup>2</sup>                | 84.80(19)  |
| P4–O5–Ba1                                                                          | 106.1(2)   | O2–Sc1–O1 <sup>7</sup>                | 99.52(19)  |
| P3–O9–Ba1 <sup>8</sup>                                                             | 98.62(18)  | O2–Sc1–O10 <sup>7</sup>               | 167.86(19) |
| P3–O9–Ba1 <sup>4</sup>                                                             | 97.45(19)  | O10 <sup>7</sup> –Sc1–O9 <sup>2</sup> | 83.69(16)  |
| P3–O7–Ba1 <sup>4</sup>                                                             | 100.45(19) | O12 <sup>4</sup> –Sc2–O7              | 88.90(17)  |
| P1–O10–Ba1 <sup>10</sup>                                                           | 111.6(2)   | O12 <sup>4</sup> –Sc2–O8 <sup>6</sup> | 86.0(2)    |
| P3–O8–Ba1 <sup>8</sup>                                                             | 103.5(2)   | O12 <sup>4</sup> –Sc2–O6 <sup>3</sup> | 178.3(2)   |
| P4–O6–Ba1                                                                          | 94.9(2)    | O4–Sc2–O12 <sup>4</sup>               | 92.36(18)  |
| O7–P3–O9                                                                           | 110.2(2)   | O4–Sc2–O7                             | 169.11(18) |
| O8–P3–O9                                                                           | 107.8(3)   | O4–Sc2–O8 <sup>6</sup>                | 88.73(18)  |
| O8–P3–O7                                                                           | 113.6(3)   | O4–Sc2–O6 <sup>3</sup>                | 86.45(18)  |
| O11–P1–O12                                                                         | 109.0(3)   | O4–Sc2–O3                             | 97.42(18)  |
| O11–P1–O10                                                                         | 113.4(3)   | O7–Sc2–O8 <sup>6</sup>                | 80.57(17)  |
| O10–P1–O12                                                                         | 111.5(3)   | O6 <sup>3</sup> –Sc2–O7               | 92.03(17)  |
| O2–P2–O1                                                                           | 111.0(3)   | O6 <sup>3</sup> –Sc2–O8 <sup>6</sup>  | 92.7(2)    |
| O3–P2–O1                                                                           | 111.0(3)   | O3–Sc2–O12 <sup>4</sup>               | 92.1(2)    |
| O3–P2–O2                                                                           | 111.8(3)   | O3–Sc2–O7                             | 93.34(18)  |
| O5–P4–O6                                                                           | 107.1(2)   | O3–Sc2–O8 <sup>6</sup>                | 173.64(19) |
| O4–P4–O5                                                                           | 112.6(2)   | O3–Sc2–O6 <sup>3</sup>                | 89.3(2)    |

---

|          |          |  |  |
|----------|----------|--|--|
| O4-P4-O6 | 112.1(3) |  |  |
|----------|----------|--|--|

<sup>1</sup> $-1/2+x, 1-y, -3/2+z$ ; <sup>2</sup> $+x, +y, -1+z$ ; <sup>3</sup> $-1/2+x, 2-y, 1/2+z$ ; <sup>4</sup> $+x, +y, 1+z$ ; <sup>5</sup> $-1/2+x, 1-y, -1/2+z$ ; <sup>6</sup> $1/2+x, 1-y, 1/2+z$ ;  
<sup>7</sup> $-1/2+x, 2-y, -1/2+z$ ; <sup>8</sup> $1/2+x, 1-y, 3/2+z$ ; <sup>9</sup> $1/2+x, 2-y, -1/2+z$ ; <sup>10</sup> $1/2+x, 2-y, 1/2+z$

**Table S3.** Fractional atomic coordinates ( $\text{\AA}\times 10^4$ ) and equivalent isotropic displacement Parameters ( $\text{\AA}^2\times 10^3$ ) for  $\text{BaSc}_2(\text{HPO}_3)_4(\text{H}_2\text{O})_2$ .

| $\text{BaSc}_2(\text{HPO}_3)_4(\text{H}_2\text{O})_2$ |            |             |             |           |
|-------------------------------------------------------|------------|-------------|-------------|-----------|
| Atom                                                  | x          | y           | z           | U(eq)     |
| Ba1                                                   | 3731.2(5)  | 5160.3(4)   | -335.4(5)   | 22.41(12) |
| Sc2                                                   | 5566.0(12) | 6255.8(11)  | 6855.0(12)  | 8.6(2)    |
| Sc1                                                   | 5673.9(12) | 8762.1(11)  | 2057.4(12)  | 8.9(2)    |
| P3                                                    | 7721.5(18) | 6477.2(18)  | 10981.3(18) | 12.2(3)   |
| P1                                                    | 8981.1(18) | 10898.1(17) | 2903.8(18)  | 12.9(3)   |
| P2                                                    | 7550.6(18) | 8991.4(18)  | 6148.3(18)  | 13.8(3)   |
| P4                                                    | 3113.8(18) | 6630.1(17)  | 2766.4(17)  | 12.1(3)   |
| O5                                                    | 3868(5)    | 7338(4)     | 1872(5)     | 15.4(9)   |
| O9                                                    | 6825(5)    | 6772(5)     | 11906(5)    | 13.7(9)   |
| O12                                                   | 8978(6)    | 12191(6)    | 1895(5)     | 31.5(12)  |
| O1                                                    | 9339(5)    | 9385(5)     | 7014(5)     | 18.4(10)  |
| O4                                                    | 4341(5)    | 6151(5)     | 4420(5)     | 21.6(10)  |
| O7                                                    | 6559(5)    | 6005(5)     | 9309(5)     | 16.4(9)   |
| O11                                                   | 7385(6)    | 10108(5)    | 2044(5)     | 19.9(10)  |
| O2                                                    | 7012(5)    | 8453(5)     | 4468(5)     | 26.0(11)  |
| O10                                                   | 9409(5)    | 11399(5)    | 4565(5)     | 23.1(11)  |
| O8                                                    | 9005(5)    | 5351(5)     | 11893(5)    | 27.8(12)  |
| O6                                                    | 2099(6)    | 5337(5)     | 1766(5)     | 28.2(11)  |
| O14                                                   | 573(6)     | 6248(6)     | -1972(7)    | 32.9(13)  |
| O3                                                    | 7176(6)    | 7879(5)     | 7078(5)     | 32.0(12)  |
| O13                                                   | 5526(8)    | 2708(7)     | -9(8)       | 41.5(15)  |

<sup>a</sup> $U_{\text{eq}}$  is defined as one third of the trace of the orthogonalized  $U_{ij}$  tensor.

---

**Table S4.** Hydrogen Atom Coordinates ( $\text{\AA} \times 10^4$ ) and Isotropic Displacement Parameters $(\text{\AA}^2 \times 10^3)$  for  $\text{BaSc}_2(\text{HPO}_3)_4(\text{H}_2\text{O})_2$ .

| $\text{BaSc}_2(\text{HPO}_3)_4(\text{H}_2\text{O})_2$ |           |           |            |         |
|-------------------------------------------------------|-----------|-----------|------------|---------|
| Atom                                                  | x         | y         | z          | U(eq)   |
| H1                                                    | 10080(70) | 9980(60)  | 2840(70)   | 4(15)   |
| H2                                                    | 6770(80)  | 10170(60) | 5910(80)   | 7       |
| H4                                                    | 2280(70)  | 7720(60)  | 3000(70)   | 10(15)  |
| H3                                                    | 8290(70)  | 7650(70)  | 10890(70)  | 18(17)  |
| H14A                                                  | -50(100)  | 6080(90)  | -1640(100) | 30(30)  |
| H14B                                                  | 490(100)  | 7140(40)  | -1890(100) | 32      |
| H13A                                                  | 6470(40)  | 2710(140) | 350(130)   | 100(50) |
| H13B                                                  | 5560(130) | 2160(120) | 690(130)   | 70(40)  |

---

**Table S5.** The quantitative analysis table of EDS.

| Element | AN | unn. C [wt.%] | norm. C [wt.%] | Atom. C [at.%] |
|---------|----|---------------|----------------|----------------|
| O       | 8  | 30.69         | 41.28          | 67.05          |
| P       | 15 | 17.35         | 23.33          | 19.58          |
| Ba      | 56 | 13.56         | 18.23          | 3.45           |
| Sc      | 21 | 12.75         | 17.15          | 9.92           |



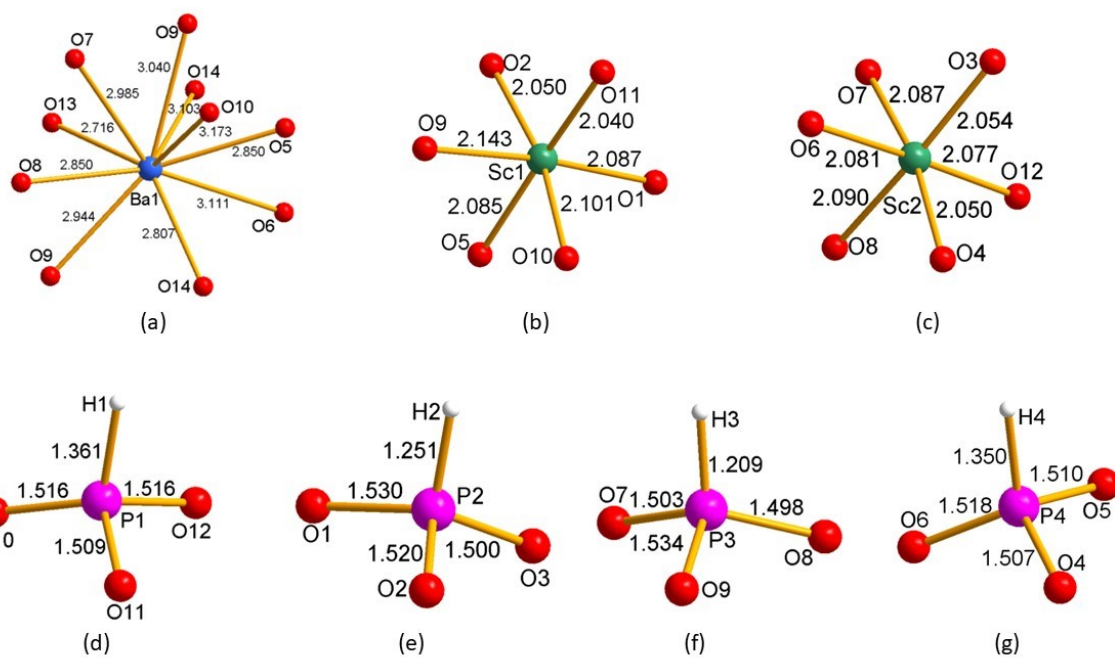

**Figure S1.** The coordination geometries of Ba, Sc and P atoms in the structure of  $\text{BaSc}_2(\text{HPO}_3)_4(\text{H}_2\text{O})_2$ .

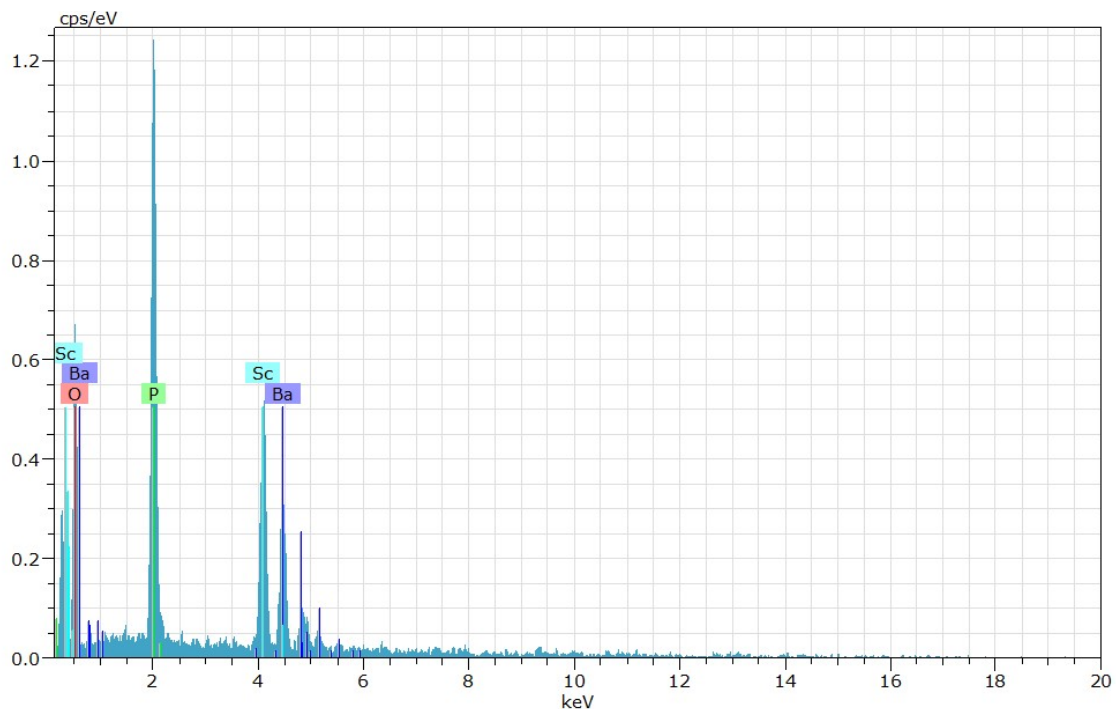

**Figure S2.** The EDS image and the quantitative analysis table of EDS for single-crystals of  $\text{BaSc}_2(\text{HPO}_3)_4(\text{H}_2\text{O})_2$ .

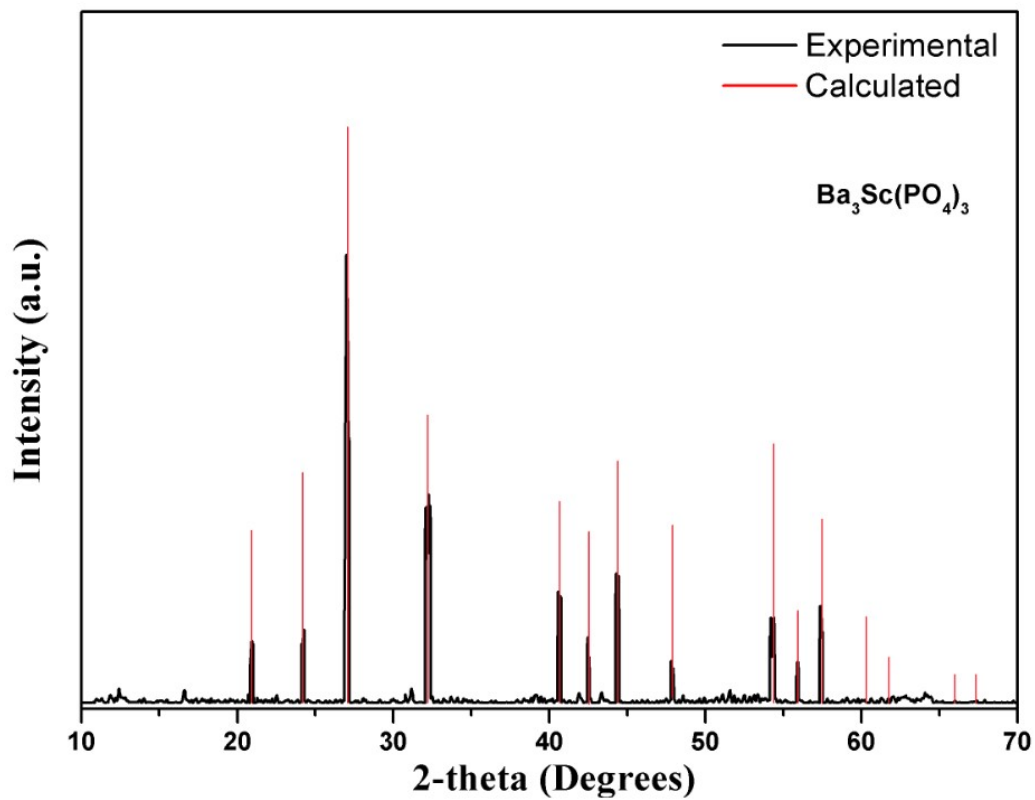

**Figure S3.** The PXR D of  $BaSc_2(HPO_3)_4(H_2O)_2$  heated to 1000 °C.
